# Supplementary material for: Neonatal Restriction of Tactile Inputs Leads to Long-Lasting Impairments of Cross-Modal Processing
Source: PLoS Biol. 2015 Nov 24;13(11):e1002304. doi: 10.1371/journal.pbio.1002304 (PMC4658190; doi:10.1371/journal.pbio.1002304)
Supplement: S1 Table — (A) Statistical testing, number of investigated rats and p-values for the analyses displayed in Fig 1. (B)–(H) Same as (A) for analyses in Figs 2–8. (XLSX) [file pbio.1002304.s009.xlsx]

## Sheet: Sheet1
A
Figure	Panel	Title	Description	Detail	Test	n	p
1		Onset of whisking	Onset of complete whisking behavior in days of CON vs. NWT rats		Kruskal Wallis	CON: 12; NWT: 17	0.379
	B	Whisker length	Whisker length of B1 whisker of NWT vs. CON rats	P0	Kruskal Wallis – Bonferroni-Holm corrected	CON: 10; NWT: 8	<0.001
				P1	Kruskal Wallis – Bonferroni-Holm corrected	CON: 10; NWT: 8	<0.001
				P2	Kruskal Wallis – Bonferroni-Holm corrected	CON: 10; NWT: 8	<0.001
				P3	Kruskal Wallis – Bonferroni-Holm corrected	CON: 10; NWT: 8	<0.001
				P4	Kruskal Wallis – Bonferroni-Holm corrected	CON: 10; NWT: 8	<0.001
				P5	Kruskal Wallis – Bonferroni-Holm corrected	CON: 10; NWT: 8	<0.001
				P6	Kruskal Wallis – Bonferroni-Holm corrected	CON: 10; NWT: 8	<0.001
				P7	Kruskal Wallis – Bonferroni-Holm corrected	CON: 10; NWT: 8	<0.001
				P8	Kruskal Wallis – Bonferroni-Holm corrected	CON: 10; NWT: 8	<0.001
				P9	Kruskal Wallis – Bonferroni-Holm corrected	CON: 10; NWT: 8	<0.001
				P10	Kruskal Wallis – Bonferroni-Holm corrected	CON: 10; NWT: 8	<0.001
				P11	Kruskal Wallis – Bonferroni-Holm corrected	CON: 10; NWT: 8	<0.001
				P12	Kruskal Wallis – Bonferroni-Holm corrected	CON: 10; NWT: 8	0.012
				P13	Kruskal Wallis – Bonferroni-Holm corrected	CON: 10; NWT: 8	0.323
				P14	Kruskal Wallis – Bonferroni-Holm corrected	CON: 10; NWT: 8	1327
				P15	Kruskal Wallis – Bonferroni-Holm corrected	CON: 10; NWT: 8	0.278
				P16	Kruskal Wallis – Bonferroni-Holm corrected	CON: 10; NWT: 8	0.463
				P17	Kruskal Wallis – Bonferroni-Holm corrected	CON: 10; NWT: 8	1408
				P18	Kruskal Wallis – Bonferroni-Holm corrected	CON: 10; NWT: 8	1477
				P19	Kruskal Wallis – Bonferroni-Holm corrected	CON: 10; NWT: 8	1910
				P20	Kruskal Wallis – Bonferroni-Holm corrected	CON: 10; NWT: 8	1910
		Whisker length	Whisker length of B2 whisker of NWT vs. CON rats	P0	Kruskal Wallis – Bonferroni-Holm corrected	CON: 10; NWT: 8	<0.001
				P1	Kruskal Wallis – Bonferroni-Holm corrected	CON: 10; NWT: 8	<0.001
				P2	Kruskal Wallis – Bonferroni-Holm corrected	CON: 10; NWT: 8	<0.001
				P3	Kruskal Wallis – Bonferroni-Holm corrected	CON: 10; NWT: 8	<0.001
				P4	Kruskal Wallis – Bonferroni-Holm corrected	CON: 10; NWT: 8	<0.001
				P5	Kruskal Wallis – Bonferroni-Holm corrected	CON: 10; NWT: 8	<0.001
				P6	Kruskal Wallis – Bonferroni-Holm corrected	CON: 10; NWT: 8	<0.001
				P7	Kruskal Wallis – Bonferroni-Holm corrected	CON: 10; NWT: 8	<0.001
				P8	Kruskal Wallis – Bonferroni-Holm corrected	CON: 10; NWT: 8	<0.001
				P9	Kruskal Wallis – Bonferroni-Holm corrected	CON: 10; NWT: 8	<0.001
				P10	Kruskal Wallis – Bonferroni-Holm corrected	CON: 10; NWT: 8	<0.001
				P11	Kruskal Wallis – Bonferroni-Holm corrected	CON: 10; NWT: 8	0.002
				P12	Kruskal Wallis – Bonferroni-Holm corrected	CON: 10; NWT: 8	0.002
				P13	Kruskal Wallis – Bonferroni-Holm corrected	CON: 10; NWT: 8	0.885
				P14	Kruskal Wallis – Bonferroni-Holm corrected	CON: 10; NWT: 8	1663
				P15	Kruskal Wallis – Bonferroni-Holm corrected	CON: 10; NWT: 8	1441
				P16	Kruskal Wallis – Bonferroni-Holm corrected	CON: 10; NWT: 8	2073
				P17	Kruskal Wallis – Bonferroni-Holm corrected	CON: 10; NWT: 8	1663
				P18	Kruskal Wallis – Bonferroni-Holm corrected	CON: 10; NWT: 8	1869
				P19	Kruskal Wallis – Bonferroni-Holm corrected	CON: 10; NWT: 8	0.691
				P20	Kruskal Wallis – Bonferroni-Holm corrected	CON: 10; NWT: 8	2073
		Whisker length	Whisker length of B3 whisker of NWT vs. CON rats	P0	Kruskal Wallis – Bonferroni-Holm corrected	CON: 10; NWT: 8	<0.001
				P1	Kruskal Wallis – Bonferroni-Holm corrected	CON: 10; NWT: 8	<0.001
				P2	Kruskal Wallis – Bonferroni-Holm corrected	CON: 10; NWT: 8	<0.001
				P3	Kruskal Wallis – Bonferroni-Holm corrected	CON: 10; NWT: 8	<0.001
				P4	Kruskal Wallis – Bonferroni-Holm corrected	CON: 10; NWT: 8	<0.001
				P5	Kruskal Wallis – Bonferroni-Holm corrected	CON: 10; NWT: 8	<0.001
				P6	Kruskal Wallis – Bonferroni-Holm corrected	CON: 10; NWT: 8	<0.001
				P7	Kruskal Wallis – Bonferroni-Holm corrected	CON: 10; NWT: 8	<0.001
				P8	Kruskal Wallis – Bonferroni-Holm corrected	CON: 10; NWT: 8	<0.001
				P9	Kruskal Wallis – Bonferroni-Holm corrected	CON: 10; NWT: 8	0.003
				P10	Kruskal Wallis – Bonferroni-Holm corrected	CON: 10; NWT: 8	<0.001
				P11	Kruskal Wallis – Bonferroni-Holm corrected	CON: 10; NWT: 8	0.001
				P12	Kruskal Wallis – Bonferroni-Holm corrected	CON: 10; NWT: 8	1912
				P13	Kruskal Wallis – Bonferroni-Holm corrected	CON: 10; NWT: 8	2742
				P14	Kruskal Wallis – Bonferroni-Holm corrected	CON: 10; NWT: 8	3212
				P15	Kruskal Wallis – Bonferroni-Holm corrected	CON: 10; NWT: 8	3776
				P16	Kruskal Wallis – Bonferroni-Holm corrected	CON: 10; NWT: 8	2175
				P17	Kruskal Wallis – Bonferroni-Holm corrected	CON: 10; NWT: 8	3776
				P18	Kruskal Wallis – Bonferroni-Holm corrected	CON: 10; NWT: 8	1809
				P19	Kruskal Wallis – Bonferroni-Holm corrected	CON: 10; NWT: 8	2175
				P20	Kruskal Wallis – Bonferroni-Holm corrected	CON: 10; NWT: 8	1981
	C	Weight of rats	Weight of CON vs. NWT rats	P0	t-test – Bonferroni-Holm corrected	CON: 16; NWT: 16	2.54243
				P1	t-test – Bonferroni-Holm corrected	CON: 16; NWT: 16	1.86351
				P2	t-test – Bonferroni-Holm corrected	CON: 16; NWT: 16	1.93722
				P3	t-test – Bonferroni-Holm corrected	CON: 16; NWT: 16	2.30517
				P4	t-test – Bonferroni-Holm corrected	CON: 16; NWT: 16	3.7098
				P5	t-test – Bonferroni-Holm corrected	CON: 16; NWT: 16	4.37027
				P6	t-test – Bonferroni-Holm corrected	CON: 16; NWT: 16	4.78132
				P7	t-test – Bonferroni-Holm corrected	CON: 16; NWT: 16	3.40149
				P8	t-test – Bonferroni-Holm corrected	CON: 16; NWT: 16	4.62224
				P9	t-test – Bonferroni-Holm corrected	CON: 16; NWT: 16	4.32441
				P10	t-test – Bonferroni-Holm corrected	CON: 16; NWT: 16	4.47454
				P11	t-test – Bonferroni-Holm corrected	CON: 16; NWT: 16	4.11536
				P12	t-test – Bonferroni-Holm corrected	CON: 16; NWT: 16	4.78132
				P13	t-test – Bonferroni-Holm corrected	CON: 16; NWT: 16	4.45243
				P14	t-test – Bonferroni-Holm corrected	CON: 16; NWT: 16	3.98826
				P15	t-test – Bonferroni-Holm corrected	CON: 16; NWT: 16	4.00002
				P16	t-test – Bonferroni-Holm corrected	CON: 16; NWT: 16	2.86967
				P17	t-test – Bonferroni-Holm corrected	CON: 16; NWT: 16	2.40378
				P18	t-test – Bonferroni-Holm corrected	CON: 16; NWT: 16	4.60886
				P19	t-test – Bonferroni-Holm corrected	CON: 16; NWT: 16	4.25688
				P20	t-test – Bonferroni-Holm corrected	CON: 16; NWT: 16	4.25688
				P21	t-test – Bonferroni-Holm corrected	CON: 16; NWT: 16	3.15224
B
Figure	Panel	Title	Description	Detail	Test	n	p
2	B	Comparison of COX stained barrels	Barrel area detected by COX staining between CON and NWT rats	A1	Kruskal Wallis – Bonferroni-Holm corrected	CON: 6; NWT: 4	4239
				A2	Kruskal Wallis – Bonferroni-Holm corrected	CON: 7; NWT: 5	2565
				A3	Kruskal Wallis – Bonferroni-Holm corrected	CON: 7; NWT: 3	4609
				A4	Kruskal Wallis – Bonferroni-Holm corrected	CON: 5; NWT: 5	1153
				B1	Kruskal Wallis – Bonferroni-Holm corrected	CON: 6; NWT: 4	5554
				B2	Kruskal Wallis – Bonferroni-Holm corrected	CON: 7; NWT: 5	4191
				B3	Kruskal Wallis – Bonferroni-Holm corrected	CON: 7; NWT: 4	0.547
				B4	Kruskal Wallis – Bonferroni-Holm corrected	CON: 6; NWT: 5	4332
				C1	Kruskal Wallis – Bonferroni-Holm corrected	CON: 6; NWT: 4	4566
				C2	Kruskal Wallis – Bonferroni-Holm corrected	CON: 7; NWT: 5	5119
				C3	Kruskal Wallis – Bonferroni-Holm corrected	CON: 7; NWT: 6	4332
				C4	Kruskal Wallis – Bonferroni-Holm corrected	CON: 4; NWT: 6	0.951
				D1	Kruskal Wallis – Bonferroni-Holm corrected	CON: 6; NWT: 4	3527
				D2	Kruskal Wallis – Bonferroni-Holm corrected	CON: 7; NWT: 5	5119
				D3	Kruskal Wallis – Bonferroni-Holm corrected	CON: 7; NWT: 6	3185
				D4	Kruskal Wallis – Bonferroni-Holm corrected	CON: 5; NWT: 4	0.507
				E1	Kruskal Wallis – Bonferroni-Holm corrected	CON: 6; NWT: 6	5555
				E2	Kruskal Wallis – Bonferroni-Holm corrected	CON: 6; NWT: 5	2000
				E3	Kruskal Wallis – Bonferroni-Holm corrected	CON: 7; NWT: 6	2063
				E4	Kruskal Wallis – Bonferroni-Holm corrected	CON: 6; NWT: 4	2919
	F	Comparison of unimodal evoked potentials	Comparison of tactile EPs in contralateral S1 between CON and NWT rats - supragranular	P1	Kruskal Wallis	CON: 1256 trials; NWT: 1089 trials	<0.001
				N1	Kruskal Wallis	CON: 1256 trials; NWT: 1089 trials	0.436
				P2	Kruskal Wallis	CON: 1256 trials; NWT: 1089 trials	<0.001
		Comparison of unimodal evoked potentials	Comparison of tactile EPs in contralateral S1 between CON and NWT rats - granular	P1	Kruskal Wallis	CON: 1754 trials; NWT: 1617 trials	<0.001
				N1	Kruskal Wallis	CON: 1754 trials; NWT: 1617 trials	<0.001
				P2	Kruskal Wallis	CON: 1754 trials; NWT: 1617 trials	<0.001
		Comparison of unimodal evoked potentials	Comparison of tactile EPs in contralateral S1 between CON and NWT rats - infragranular	P1	Kruskal Wallis	CON: 1462 trials; NWT: 1315 trials	<0.001
				N1	Kruskal Wallis	CON: 1462 trials; NWT: 1315 trials	<0.001
				P2	Kruskal Wallis	CON: 1462 trials; NWT: 1315 trials	<0.001
	G	Comparison of unimodal evoked potentials	Comparison of visual EPs in contralateral S1 between CON and NWT rats - supragranular	P1	Kruskal Wallis	CON: 1302 trials; NWT: 1101 trials	<0.001
				N1	Kruskal Wallis	CON: 1302 trials; NWT: 1101 trials	0.483
				P2	Kruskal Wallis	CON: 1302 trials; NWT: 1101 trials	0.047
		Comparison of unimodal evoked potentials	Comparison of visual EPs in contralateral S1 between CON and NWT rats - granular	P1	Kruskal Wallis	CON: 1812 trials; NWT: 1582 trials	<0.001
				N1	Kruskal Wallis	CON: 1812 trials; NWT: 1582 trials	0.498
				P2	Kruskal Wallis	CON: 1812 trials; NWT: 1582 trials	0.358
		Comparison of unimodal evoked potentials	Comparison of visual EPs in contralateral S1 between CON and NWT rats - infragranular	P1	Kruskal Wallis	CON: 1707 trials; NWT: 1357 trials	<0.001
				N1	Kruskal Wallis	CON: 1707 trials; NWT: 1357 trials	0.793
				P2	Kruskal Wallis	CON: 1707 trials; NWT: 1357 trials	<0.001
	H	Comparison of unimodal evoked potentials	Comparison of visual EPs in contralateral V1 between CON and NWT rats - supragranular	P1	Kruskal Wallis	CON: 1135 trials; NWT: 1548 trials	<0.001
				N1	Kruskal Wallis	CON: 1135 trials; NWT: 1548 trials	<0.001
		Comparison of unimodal evoked potentials	Comparison of visual EPs in contralateral V1 between CON and NWT rats - granular	P1	Kruskal Wallis	CON: 1807 trials; NWT: 1812 trials	0.098
				N1	Kruskal Wallis	CON: 1807 trials; NWT: 1812 trials	<0.001
				P2	Kruskal Wallis	CON: 1807 trials; NWT: 1812 trials	<0.001
		Comparison of unimodal evoked potentials	Comparison of visual EPs in contralateral V1 between CON and NWT rats - infragranular	P1	Kruskal Wallis	CON: 1794 trials; NWT: 1707 trials	<0.001
				N1	Kruskal Wallis	CON: 1794 trials; NWT: 1707 trials	0.006
C
Figure	Panel	Title	Description	Detail	Test	n	p
3	A	Cross-modal effect on evoked potentials in CON rats	Comparison of EP peak supragranular cross-modal vs. tactile	P1	Kruskal Wallis – Bonferroni-Holm corrected	1256 trials	0.291
				N1	Kruskal Wallis – Bonferroni-Holm corrected	1256 trials	0.120
			Comparison of EP peak supragranular cross-modal vs. additive	P1	Kruskal Wallis – Bonferroni-Holm corrected	1256 trials	<0.001
				N1	Kruskal Wallis – Bonferroni-Holm corrected	1256 trials	0.601
			Comparison of EP peak granular cross-modal vs. tactile	P1	Kruskal Wallis – Bonferroni-Holm corrected	1754 trials	0.003
				N1	Kruskal Wallis – Bonferroni-Holm corrected	1754 trials	<0.001
			Comparison of EP peak granular cross-modal vs. additive	P1	Kruskal Wallis – Bonferroni-Holm corrected	1754 trials	<0.001
				N1	Kruskal Wallis – Bonferroni-Holm corrected	1754 trials	0.016
			Comparison of EP peak infragranular cross-modal vs. tactile	P1	Kruskal Wallis – Bonferroni-Holm corrected	1462 trials	0.001
				N1	Kruskal Wallis – Bonferroni-Holm corrected	1462 trials	<0.001
			Comparison of EP peak infragranular cross-modal vs. additive	P1	Kruskal Wallis – Bonferroni-Holm corrected	1462 trials	<0.001
				N1	Kruskal Wallis – Bonferroni-Holm corrected	1462 trials	0.310
		Cross-modal effect on evoked potentials in NWT rats	Comparison of EP peak supragranular cross-modal vs. tactile	P1	Kruskal Wallis – Bonferroni-Holm corrected	1089 trials	0.451
				N1	Kruskal Wallis – Bonferroni-Holm corrected	1089 trials	0.973
			Comparison of EP peak supragranular cross-modal vs. additive	P1	Kruskal Wallis – Bonferroni-Holm corrected	1089 trials	0.795
				N1	Kruskal Wallis – Bonferroni-Holm corrected	1089 trials	0.413
			Comparison of EP peak granular cross-modal vs. tactile	P1	Kruskal Wallis – Bonferroni-Holm corrected	1617 trials	0.515
				N1	Kruskal Wallis – Bonferroni-Holm corrected	1617 trials	<0.001
			Comparison of EP peak granular cross-modal vs. additive	P1	Kruskal Wallis – Bonferroni-Holm corrected	1617 trials	0.683
				N1	Kruskal Wallis – Bonferroni-Holm corrected	1617 trials	0.374
			Comparison of EP peak infragranular cross-modal vs. tactile	P1	Kruskal Wallis – Bonferroni-Holm corrected	1315 trials	0.236
				N1	Kruskal Wallis – Bonferroni-Holm corrected	1315 trials	<0.001
			Comparison of EP peak infragranular cross-modal vs. additive	P1	Kruskal Wallis – Bonferroni-Holm corrected	1315 trials	0.728
				N1	Kruskal Wallis – Bonferroni-Holm corrected	1315 trials	0.659
	B	Mean relative power	Comparison of mean relative power unimodal vs. bimodal in CON rats - supragranular	150-230 ms	Kruskal Wallis	13 hemispheres	0.038
				440-550 ms	t-test	13 hemispheres	0.125
				850-900 ms	Kruskal Wallis	13 hemispheres	0.212
			Comparison of mean relative power unimodal vs. bimodal in CON rats - granular	150-230 ms	t-test	18 hemispheres	0.002
				440-550 ms	Kruskal Wallis	18 hemispheres	0.002
				850-900 ms	Kruskal Wallis	18 hemispheres	0.015
			Comparison of mean relative power unimodal vs. bimodal in CON rats - infragranular	150-230 ms	t-test	15 hemispheres	<0.001
				440-550 ms	Kruskal Wallis	15 hemispheres	0.026
				850-900 ms	Kruskal Wallis	15 hemispheres	0.069
			Comparison of mean relative power unimodal vs. bimodal in NWT rats - supragranular	150-230 ms	t-test	11 hemispheres	0.070
				440-550 ms	Kruskal Wallis	11 hemispheres	0.692
				850-900 ms	t-test	11 hemispheres	0.820
			Comparison of mean relative power unimodal vs. bimodal in NWT rats - granular	150-230 ms	t-test	17 hemispheres	0.002
				440-550 ms	Kruskal Wallis	17 hemispheres	0.595
				850-900 ms	t-test	17 hemispheres	0.431
			Comparison of mean relative power unimodal vs. bimodal in NWT rats - infragranular	150-230 ms	t-test	14 hemispheres	0.003
				440-550 ms	Kruskal Wallis	14 hemispheres	0.718
				850-900 ms	t-test	14 hemispheres	0.149
			Comparison of mean relative power difference between NWT and CON rats - supragranular	150-230 ms	t-test	CON: 13 hemispheres; NWT: 11 hemispheres	0.684
				440-550 ms	t-test	CON: 13 hemispheres; NWT: 11 hemispheres	0.745
				850-900 ms	t-test	CON: 13 hemispheres; NWT: 11 hemispheres	0.170
			Comparison of mean relative power difference between NWT and CON rats - granular	150-230 ms	t-test	CON: 18 hemispheres; NWT: 17 hemispheres	0.233
				440-550 ms	Kruskal Wallis	CON: 18 hemispheres; NWT: 17 hemispheres	0.006
				850-900 ms	t-test	CON: 18 hemispheres; NWT: 17 hemispheres	0.025
			Comparison of mean relative power difference between NWT and CON rats - infragranular	150-230 ms	t-test	CON: 15 hemispheres; NWT: 14 hemispheres	0.149
				440-550 ms	t-test	CON: 15 hemispheres; NWT: 14 hemispheres	0.389
				850-900 ms	t-test	CON: 15 hemispheres; NWT: 14 hemispheres	0.087
D
Figure	Panel	Title	Description	Detail	Test	n	p
4		Comparison of retrogradely labeled cells	Comparison of cell number in CON vs. NWT animals		t-test	CON : 7; NWT: 5	0.023
E
Figure	Panel	Title	Description	Detail	Test	n	p
5	B	Mean relative coherence change ipsilateral in CON	Mean relative coherence change after bimodal stimulation against mean relative coherence change after unimodal stimulation in CON rats	V1 gran – S1 supragran	Kruskal Wallis	13 hemispheres	0.008
				V1 gran – S1 gran	Kruskal Wallis	18 hemispheres	0.017
				V1 gran – S1 infragran	Kruskal Wallis	15 hemispheres	0.030
		Mean relative coherence change ipsilateral in NWT	Mean relative coherence change after bimodal stimulation against mean relative coherence change after unimodal stimulation in NWT rats	V1 gran – S1 supragran	Kruskal Wallis	11 hemispheres	0.469
				V1 gran – S1 gran	Kruskal Wallis	17 hemispheres	0.125
				V1 gran – S1 infragran	Kruskal Wallis	14 hemispheres	0.095
		Mean relative coherence change contralateral in CON	Mean relative coherence change after bimodal stimulation against mean relative coherence change after unimodal stimulation in CON rats	V1 gran – S1 supragran	Kruskal Wallis	13 hemispheres	0.788
				V1 gran – S1 gran	Kruskal Wallis	18 hemispheres	0.707
				V1 gran – S1 infragran	Kruskal Wallis	15 hemispheres	0.816
		Mean relative coherence change contralateral in NWT	Mean relative coherence change after bimodal stimulation against mean relative coherence change after unimodal stimulation in NWT rats	V1 gran – S1 supragran	Kruskal Wallis	11 hemispheres	0.392
				V1 gran – S1 gran	Kruskal Wallis	17 hemispheres	0.527
				V1 gran – S1 infragran	Kruskal Wallis	14 hemispheres	0.443
		Comparison of mean relative coherence changes contralateral between CON and NWT rats	Mean relative coherence change in CON rats against mean relative coherence change in NWT rats	V1 gran – S1 supragran	Kruskal Wallis	CON: 13 hemispheres; NWT: 11 hemispheres	0.678
				V1 gran – S1 gran	Kruskal Wallis	CON: 18 hemispheres; NWT: 17 hemispheres	0.612
				V1 gran – S1 infragran	Kruskal Wallis	CON: 15 hemispheres; NWT: 14 hemispheres	0.888
F
Figure	Panel	Title	Description	Detail	Test	n	p
6	C	Comparison of relative change of directionality	Comparison of directionality change between CON and NWT rats from V1 to S1 -supragranular-supragranular	0-0.2s	t-test	CON: 9 hemispheres; NWT: 9 hemispheres	0.955
				0.2-1s	Kruskal Wallis	CON: 9 hemispheres; NWT: 9 hemispheres	0.145
			Comparison of directionality change between CON and NWT rats from V1 to S1 -supragranular-granular	0-0.2s	Kruskal Wallis	CON: 10 hemispheres; NWT: 9 hemispheres	0.429
				0.2-1s	t-test	CON: 10 hemispheres; NWT: 9 hemispheres	< 0.001
			Comparison of directionality change between CON and NWT rats from V1 to S1 -supragranular-infragranular	0-0.2s	Kruskal Wallis	CON: 10 hemispheres; NWT: 9 hemispheres	0.262
				0.2-1s	Kruskal Wallis	CON: 10 hemispheres; NWT: 9 hemispheres	0.010
			Comparison of directionality change between CON and NWT rats from V1 to S1 -granular-supragranular	0-0.2s	Kruskal Wallis	CON: 11 hemispheres; NWT: 10 hemispheres	0.020
				0.2-1s	Kruskal Wallis	CON: 11 hemispheres; NWT: 10 hemispheres	0.309
			Comparison of directionality change between CON and NWT rats from V1 to S1 -granular-granular	0-0.2s	Kruskal Wallis	CON: 15 hemispheres; NWT: 13 hemispheres	0.927
				0.2-1s	t-test	CON: 15 hemispheres; NWT: 13 hemispheres	0.010
			Comparison of directionality change between CON and NWT rats from V1 to S1 -granular-infragranular	0-0.2s	t-test	CON: 14 hemispheres; NWT: 13 hemispheres	0.605
				0.2-1s	t-test	CON: 14 hemispheres; NWT: 13 hemispheres	0.025
			Comparison of directionality change between CON and NWT rats from V1 to S1 -infragranular-supragranular	0-0.2s	Kruskal Wallis	CON: 9 hemispheres; NWT: 9 hemispheres	0.550
				0.2-1s	Kruskal Wallis	CON: 9 hemispheres; NWT: 9 hemispheres	0.178
			Comparison of directionality change between CON and NWT rats from V1 to S1 -infragranular-granular	0-0.2s	t-test	CON: 13 hemispheres; NWT: 11 hemispheres	0.854
				0.2-1s	Kruskal Wallis	CON: 13 hemispheres; NWT: 11 hemispheres	0.008
			Comparison of directionality change between CON and NWT rats from V1 to S1 -infragranular-infragranular	0-0.2s	Kruskal Wallis	CON: 12 hemispheres; NWT: 10 hemispheres	0.794
				0.2-1s	t-test	CON: 12 hemispheres; NWT: 10 hemispheres	0.027
	F		Comparison of directionality change between CON and NWT rats from S1 to V1 -supragranular-supragranular	0-0.2s	t-test	CON: 9 hemispheres; NWT: 9 hemispheres	0.049
				0.2-1s	Kruskal Wallis	CON: 9 hemispheres; NWT: 9 hemispheres	0.627
			Comparison of directionality change between CON and NWT rats from S1 to V1 -supragranular-granular	0-0.2s	Kruskal Wallis	CON: 10 hemispheres; NWT: 9 hemispheres	0.123
				0.2-1s	t-test	CON: 10 hemispheres; NWT: 9 hemispheres	0.071
			Comparison of directionality change between CON and NWT rats from S1 to V1 -supragranular-infragranular	0-0.2s	t-test	CON: 10 hemispheres; NWT: 9 hemispheres	0.086
				0.2-1s	t-test	CON: 10 hemispheres; NWT: 9 hemispheres	0.032
			Comparison of directionality change between CON and NWT rats from S1 to V1 -granular-supragranular	0-0.2s	t-test	CON: 11 hemispheres; NWT: 10 hemispheres	0.202
				0.2-1s	Kruskal Wallis	CON: 11 hemispheres; NWT: 10 hemispheres	0.086
			Comparison of directionality change between CON and NWT rats from S1 to V1 -granular-granular	0-0.2s	Kruskal Wallis	CON: 15 hemispheres; NWT: 13 hemispheres	0.108
				0.2-1s	t-test	CON: 15 hemispheres; NWT: 13 hemispheres	< 0.001
			Comparison of directionality change between CON and NWT rats from S1 to V1 -granular-infragranular	0-0.2s	Kruskal Wallis	CON: 14 hemispheres; NWT: 13 hemispheres	0.108
				0.2-1s	Kruskal Wallis	CON: 14 hemispheres; NWT: 13 hemispheres	0.017
			Comparison of directionality change between CON and NWT rats from S1 to V1 -infragranular-supragranular	0-0.2s	t-test	CON: 9 hemispheres; NWT: 9 hemispheres	0.225
				0.2-1s	Kruskal Wallis	CON: 9 hemispheres; NWT: 9 hemispheres	0.598
			Comparison of directionality change between CON and NWT rats from S1 to V1 -infragranular-granular	0-0.2s	Kruskal Wallis	CON: 13 hemispheres; NWT: 11 hemispheres	0.374
				0.2-1s	t-test	CON: 13 hemispheres; NWT: 11 hemispheres	0.0478
			Comparison of directionality change between CON and NWT rats from S1 to V1 -infragranular-infragranular	0-0.2s	t-test	CON: 12 hemispheres; NWT: 10 hemispheres	0.794
				0.2-1s	t-test	CON: 12 hemispheres; NWT: 10 hemispheres	0.030
G
Figure	Panel	Title	Description	Detail	Test	n	p
7		Comparison between groups in open field	Comparison of rearing in CON vs. NWT rats	Occurence	t-test	CON: 15; NWT: 16	0.274
				Duration	t-test	CON: 15; NWT: 16	0.207
			Comparison of wall rearing in CON vs. NWT rats	Occurence	t-test	CON: 15; NWT: 16	0.724
				Duration	t-test	CON: 15; NWT: 16	0.505
			Comparison of grooming in CON vs. NWT rats	Occurence	t-test	CON: 15; NWT: 16	0.553
				Duration	t-test	CON: 15; NWT: 16	0.553
			Comparison of velocity in CON vs. NWT rats		t-test	CON: 15; NWT: 16	0.801
			Comparison of times spent in cornerzones between CON and NWT rats		t-test	CON: 15; NWT: 16	0.356
			Comparison of times spent in borderzones between CON and NWT rats		t-test	CON: 15; NWT: 16	0.267
			Comparison of times spent in open field between CON and NWT rats		t-test	CON: 15; NWT: 16	0.947
			Comparison of latency to first open field entry between CON and NWT rats		t-test	CON: 15; NWT: 16	0.966
			Comparison of distance spent in cornerzones between CON and NWT rats		t-test	CON: 15; NWT: 16	0.348
			Comparison of distance spent in borderzones between CON and NWT rats		t-test	CON: 15; NWT: 16	0.933
			Comparison of distance spent in open field between CON and NWT rats		t-test	CON: 15; NWT: 16	0.790
			Comparison of total distances traveled between CON and NWT rats		t-test	CON: 15; NWT: 16	0.795
H
Figure	Panel	Title	Description	Detail	Test	n	p
8	C	Comparison of relative interaction times during novel object recognition in the continuous setting	Comparison of relative interaction between novel and familiar object during bimodal exploration	CON rats	t-test	15	< 0.001
				NWT rats	t-test	18	< 0.001
			Comparison of relative interaction between novel and familiar object during tactile exploration	CON rats	Kruskal Wallis	7	< 0.001
				NWT rats	t-test	11	0.024
			Comparison of relative interaction between novel and familiar object during visual exploration	CON rats	t-test	8	0.025
				NWT rats	Kruskal Wallis	7	0.183
			Comparison of relative interaction between novel and familiar object during cross-modal exploration	CON rats	t-test	15	0.002
				NWT rats	t-test	18	0.371
	D	Comparison of discrimination ratio during novel object recognition in the continuous setting	Comparison of discrimination ratio between CON and NWT rats in the bimodal setting		t-test	CON: 15; NWT: 18	0.475
			Comparison of discrimination ratio between CON and NWT rats in the tactile setting		t-test	CON: 7; NWT: 11	0.458
			Comparison of discrimination ratio between CON and NWT rats in the visual setting		t-test	CON: 8; NWT: 7	0.555
			Comparison of discrimination ratio between CON and NWT rats in the cross-modal setting		t-test	CON: 15; NWT: 18	0.033
	E	Comparison of relative interaction times during novel object recognition in the discrete setting	Comparison of relative interaction between novel and familiar object during bimodal exploration	CON rats	t-test	9	0.002
				NWT rats		10	0.001
			Comparison of relative interaction between novel and familiar object during tactile exploration	CON rats	t-test	10	< 0.001
				NWT rats		9	0.009
			Comparison of relative interaction between novel and familiar object during visual exploration	CON rats	t-test	8	0.009
				NWT rats	Kruskal Wallis	6	0.241
			Comparison of relative interaction between novel and familiar object during cross-modal exploration	CON rats	t-test	9	0.027
				NWT rats	t-test	8	0.179
	F	Comparison of discrimination ratio during novel object recognition in the discrete setting	Comparison of discrimination ratio between CON and NWT rats in the bimodal setting		t-test	CON: 9; NWT: 10	0.834
			Comparison of discrimination ratio between CON and NWT rats in the tactile setting		t-test	CON: 10; NWT: 9	0.852
			Comparison of discrimination ratio between CON and NWT rats in the visual setting		Kruskal Wallis	CON: 8; NWT: 6	0.172
			Comparison of discrimination ratio between CON and NWT rats in the cross-modal setting		t-test	CON: 9; NWT: 8	0.076
