# Supplementary material for: Neonatal Restriction of Tactile Inputs Leads to Long-Lasting Impairments of Cross-Modal Processing
Source: PLoS Biol. 2015 Nov 24;13(11):e1002304. doi: 10.1371/journal.pbio.1002304 (PMC4658190; doi:10.1371/journal.pbio.1002304)
Supplement: S2 Table — (A) Photographs displaying the objects used for testing of novel object recognition. The numbers correspond to those mentioned in the tables. (B) Table summarizing the object distribution in the continuous setting. (C) Table summarizing the object distribution in the discrete setting. (XLSX) [file pbio.1002304.s010.xlsx]

## Sheet: Tabelle1
A
		1	2	3	4	5	6	7
B
Group	Animal Number	Condition
		Bimodal		Tactile		Visual		Cross-modal
		FO	NO	FO	NO	FO	NO	FO	NO
CON	1	5	1			7	3	6	2
	2	5	4			1	7	3	6
	3	7	2	5	4			3	1
	4	7	2	6	4			3	1
	5	1	3			7	4	6	2
	6	7	1	5	2			3	6
	7	6	4	5	2			7	3
	8	5	2			3	4	5	1
	9	7	4	6	1			5	2
	10	1	2			7	4	6	3
	11	1	3	6	4			5	2
	12	7	2	6	4			5	3
	13	5	2			7	4	6	3
	14	1	7			6	2	3	4
	15	7	4			5	2	3	6
NWT	1	1	2	3	4			5	6
	2	3	4	5	2			7	6
	3	1	2			3	4	6	5
	4	7	4			3	2	6	5
	5	1	4	5	2			7	6
	6	1	2	5	3			7	6
	7	1	4			5	7	3	2
	8	3	6	5	2			1	2
	9	5	4			1	7	6	2
	10	7	2	5	4			3	1
	11	7	5	3	4			1	2
	12	5	2			7	4	1	6
	13	1	4	6	7			3	2
	14	7	4	3	2			5	6
	15	7	4			3	2	6	5
	16	5	2	7	6			3	4
	17	1	2	3	4			5	6
	18	3	4			7	5	1	2
C
Group	Animal Number	Condition
		Bimodal		Tactile		Visual		Cross-modal
		FO	NO	FO	NO	FO	NO	FO	NO
CON	1	7	2
	2	5	2
	3	5	6
	4	1	2
	5	7	2
	6	7	2
	7	3	6
	8	6	2
	9	1	5
	10			1	4
	11			1	2
	12			3	7
	13			3	6
	14			6	5
	15			6	4
	16			7	6
	17			5	4
	18			3	2
	19			6	4
	20					1	3
	21					5	7
	22					1	2
	23					1	5
	24					5	3
	25					3	2
	26					5	4
	27					1	5
	28							5	4
	29							7	3
	30							1	3
	31							3	6
	32							1	2
	33							5	1
	34							3	4
	35							7	3
	36							1	5
NWT	1	5	1
	2	7	2
	3	7	3
	4	4	5
	5	1	4
	6	5	2
	7	7	6
	8	1	6
	9	6	3
	10	5	7
	11			3	6
	12			4	3
	13			3	7
	14			1	2
	15			1	5
	16			7	2
	17			1	2
	18			5	2
	19			3	4
	20					7	4
	21					5	4
	22					7	2
	23					7	3
	24					6	1
	25					4	6
	26							1	6
	27							6	2
	28							5	2
	29							5	4
	30							5	3
	31							7	3
	32							3	4
	33							7	6
